# Supplementary material for: Protic poly(diallylmethylammonium) poly(ionic liquid) proton exchange membranes with low fluorine content
Source: Royal Society of Chemistry journal article supplement (doi:10.1039/d4py01099j), 2024-01-01
Supplement: d4py01099j1.pdf [file d4py01099j1.pdf]

Supporting Information

## Protic poly(diallylmethylammonium) poly(ionic liquid)s proton exchange membranes with low fluorine content

Yuliana Pairetti<sup>1</sup>, Antonela Gallastegui<sup>1\*</sup>, Zaneta Wojnarowska<sup>2</sup>, Marian Paluch<sup>2</sup>, Ilaria Abdel Aziz<sup>1</sup>, Nerea Casado<sup>1,3</sup>, Luke A. O'Dell<sup>4</sup>, Maria Forsyth<sup>3,4</sup>, David Mecerreyes<sup>1,3\*</sup>

<sup>1</sup>POLYMAT, University of the Basque Country UPV/EHU, Avenida Tolosa 72, Donostia-San Sebastian, 20018, Gipuzkoa, Spain

<sup>2</sup>Institute of Physics, University of Silesia, Uniwersytecka 4, Katowice 40-007, Poland

<sup>3</sup>IKERBASQUE, Basque Foundation for Science, Bilbao, Spain

<sup>4</sup>Institute for Frontier Materials and ARC Industry Training Transformation Centre for Future Energy Storage Technologies (StorEnergy), Deakin University, Burwood, Victoria 3125, Australia

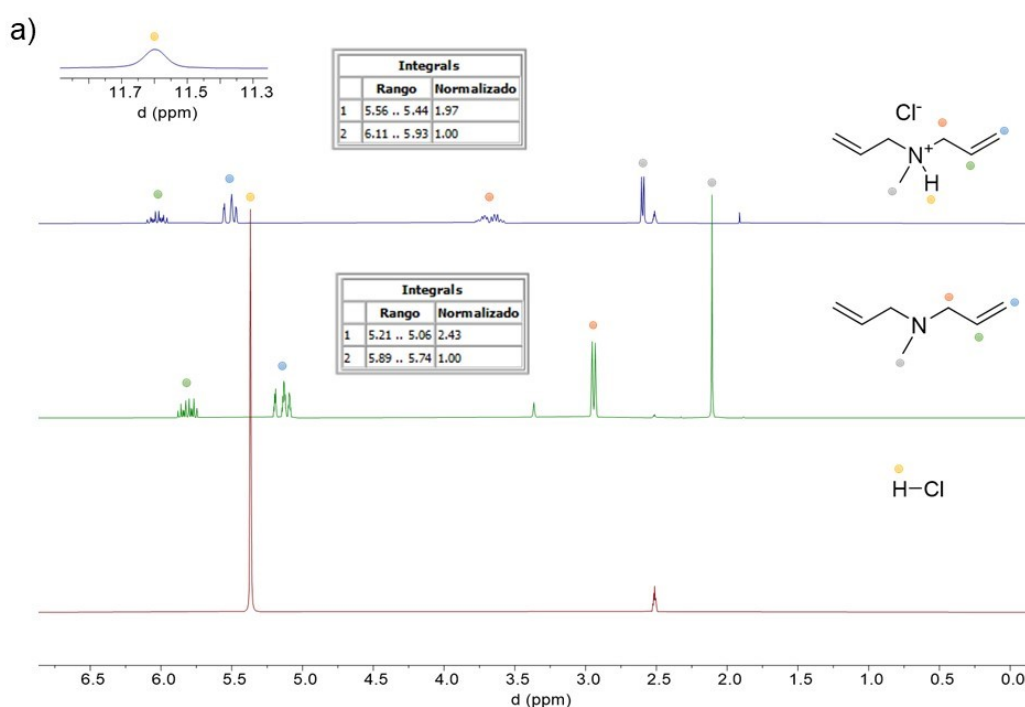

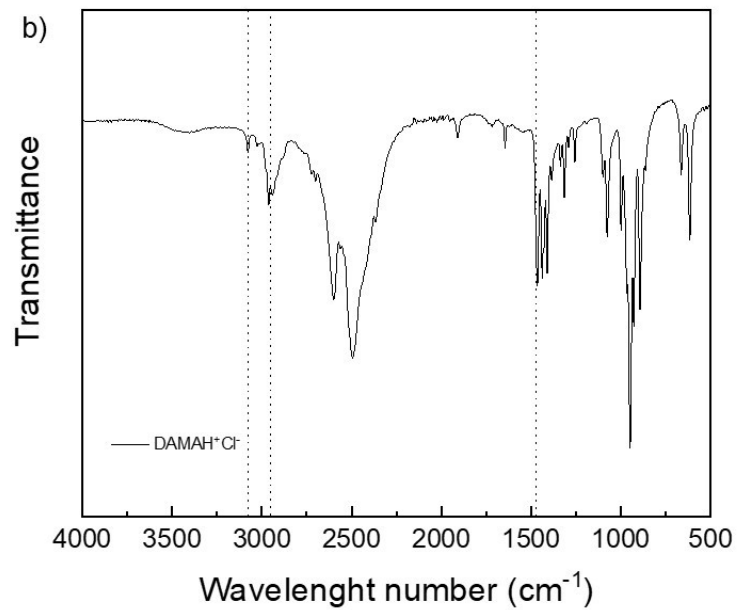

Figure S1. (a) <sup>1</sup>H NMR spectra comparison between DAMA, HCl and the protic DAMAH<sup>+</sup>Cl<sup>-</sup> monomer (b) FTIR spectra of DAMAH<sup>+</sup>Cl<sup>-</sup>.

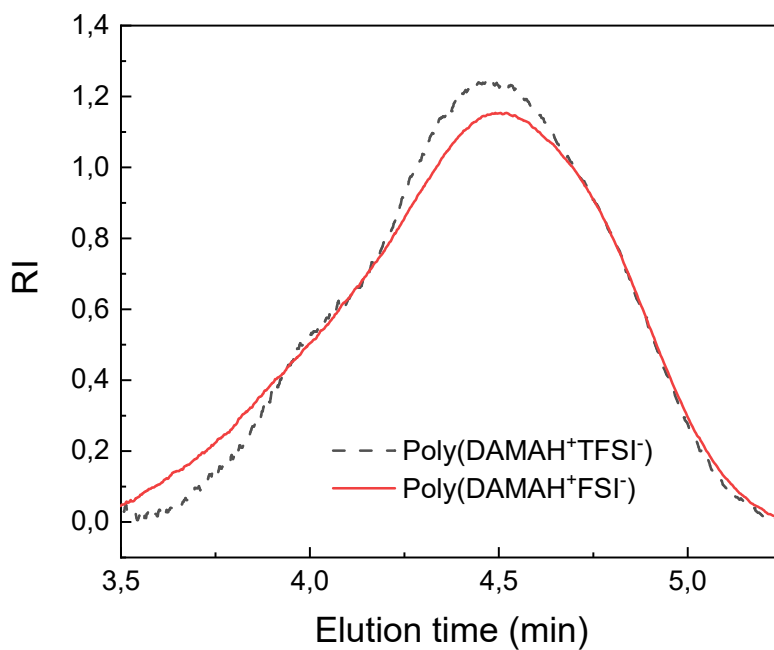

Figure S2. SEC result of both poly(DAMAH<sup>+</sup>TFSI<sup>-</sup>) and poly(DAMAH<sup>+</sup>FSI<sup>-</sup>) carried out in THF.

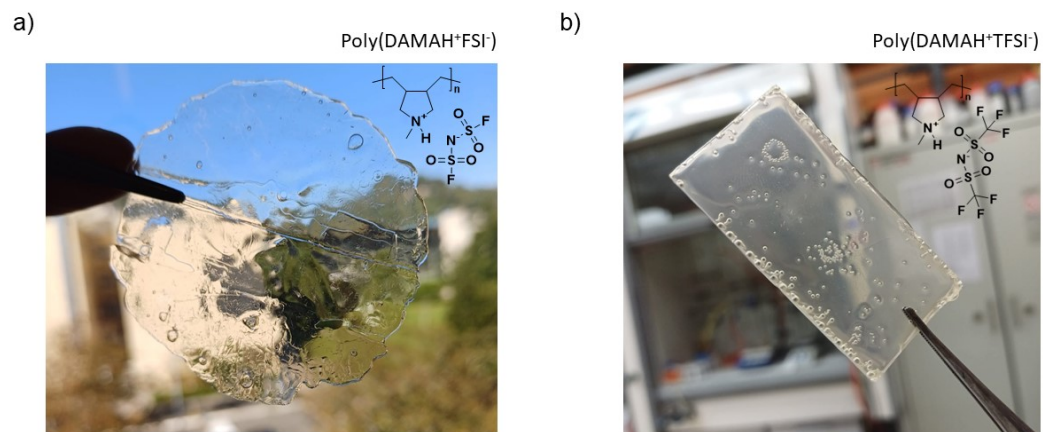

Figure S3. Protic membrane pictures of poly(DAMAH<sup>+</sup>FSI<sup>-</sup>) (a) and poly(DAMAH<sup>+</sup>TFSI<sup>-</sup>) (b).

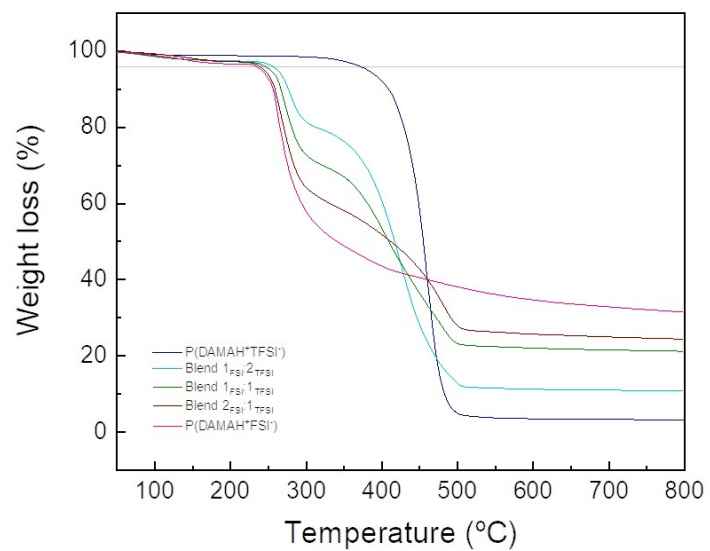

Figure S4. TGA results for all protic membranes.

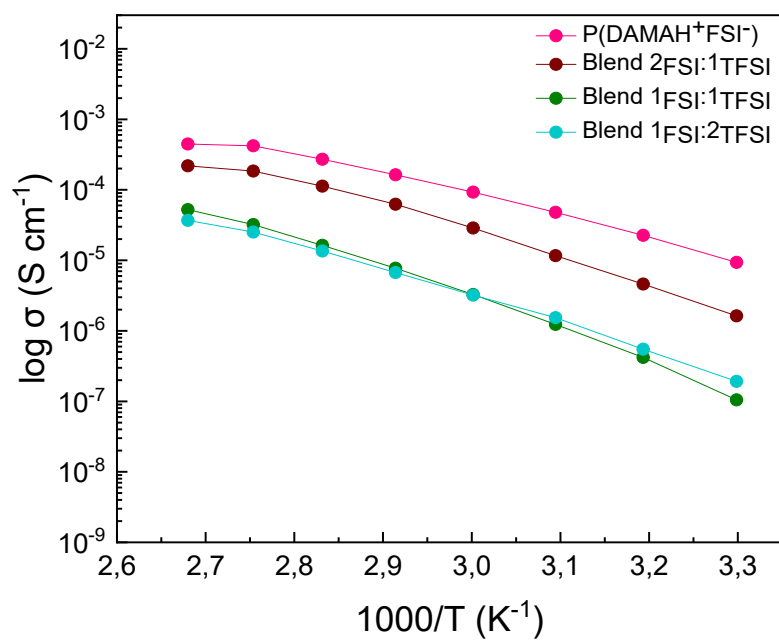

Figure S5. Ionic conductivity measurements by electrochemical impedance spectroscopy (EIS) at dry state from 30 to 100 °C of all protic membranes.

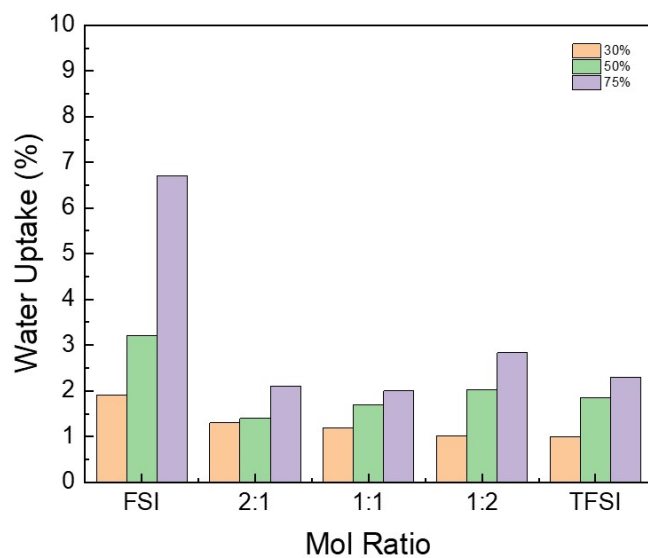

Figure S6. Water uptake (%) versus mol ratio between poly(DAMAH<sup>+</sup>TFSI<sup>-</sup>) and poly(DAMAH<sup>+</sup>FSI<sup>-</sup>) for all protic membranes at room temperature and 30, 50 and 75 RH%.

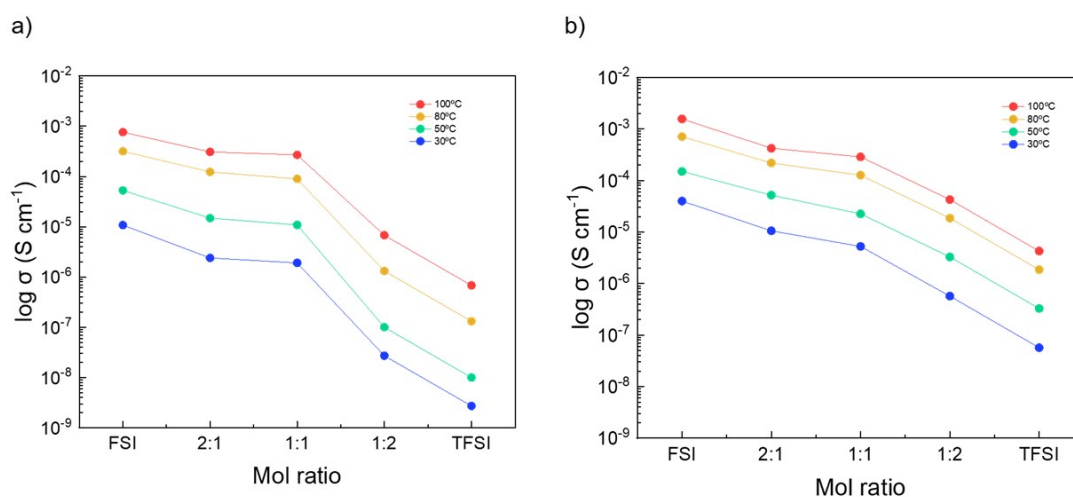

Figure S7. Ionic conductivity measurements by electrochemical impedance spectroscopy (EIS) under 30 (a) and 50% (b) RH at 30, 50, 80 and 100 °C of all protic membranes.

| Polymer                                     | $E_a$ (J/mol) (dry) | $E_a$ (J/mol) RH 75% |
|---------------------------------------------|---------------------|----------------------|
| Poly(DAMAH <sup>+</sup> FSI <sup>-</sup> )  | 53                  | 39                   |
| Blend 2 <sub>FSI</sub> :1 <sub>TFSI</sub>   | 68                  | 45                   |
| Blend 1 <sub>FSI</sub> :1 <sub>TFSI</sub>   | 83                  | 50                   |
| Blend 1 <sub>FSI</sub> :2 <sub>TFSI</sub>   | 71                  | 49                   |
| Poly(DAMAH <sup>+</sup> TFSI <sup>-</sup> ) |                     | 40                   |

Table S1. Activation energy ( $E_a$ ) data for the protic membranes at dry and 75% RH states.
